# Supplementary material
Source: PubMed Central journal article supplement (PMC8242717)
Supplement: JGS-69-2070-s001.pdf [file JGS-69-2070-s001.pdf]

**Supplemental Table S1– Full Regression Models of Nursing Home Resident COVID-19 on Facility Star Ratings<sup>a</sup>**

| Independent Variable             | Cumulative Resident Incidence |                   | Cumulative Resident Mortality |                   | Number of weeks with high resident incidence |                   |
|----------------------------------|-------------------------------|-------------------|-------------------------------|-------------------|----------------------------------------------|-------------------|
|                                  | IRR/OR                        | (95% CI)          | IRR/OR                        | (95% CI)          | IRR/OR                                       | (95% CI)          |
| <b>Overall Quality Rating</b>    |                               |                   |                               |                   |                                              |                   |
| ★                                | 1.158                         | (1.105-1.213)**** | 1.096                         | (1.030-1.167)**   | 1.081                                        | (1.037-1.128)***  |
| ★★                               | 1.129                         | (1.083-1.178)**** | 1.081                         | (1.021-1.144)**   | 1.103                                        | (1.062-1.146)**** |
| ★★★                              | 1.154                         | (1.107-1.204)**** | 1.104                         | (1.043-1.168)***  | 1.093                                        | (1.052-1.136)**** |
| ★★★★                             | 1.080                         | (1.038-1.124)***  | 1.039                         | (0.985-1.097)     | 1.055                                        | (1.018-1.094)**   |
| ★★★★★                            | 1.000                         | Reference         | 1.000                         | Reference         | 1.000                                        | Reference         |
| % Medicaid residents in facility | 1.002                         | (1.002-1.003)**** | 1.000                         | (0.999-1.001)     | 1.001                                        | (1.001-1.002)***  |
| County COVID rate (cases/1000)   | 1.004                         | (1.003-1.005)**** | 1.001                         | (1.000-1.002)**   | 1.005                                        | (1.004-1.006)**** |
| Number of certified beds         | 1.000                         | (0.999-1.000)***  | 0.999                         | (0.999-1.000)**** | 1.001                                        | (1.001-1.001)**** |
| Urban facility                   | 1.025                         | (0.988-1.064)     | 0.983                         | (0.934-1.034)     | 1.182                                        | (1.142-1.223)**** |
| County Area Deprivation Index    | 1.001                         | (1.001-1.002)***  | 1.000                         | (0.999-1.001)     | 1.004                                        | (1.003-1.005)**** |
| <b>Zero Model<sup>b</sup></b>    |                               |                   |                               |                   |                                              |                   |
| County COVID rate (cases/1000)   | 0.967                         | (0.962-0.971)**** | 0.970                         | (0.966-0.975)**** | 0.968                                        | (0.964-0.973)**** |
| Number of certified beds         | 0.972                         | (0.970-0.975)**** | 0.981                         | (0.979-0.983)**** | 0.983                                        | (0.981-0.986)**** |
| Urban facility                   | 0.337                         | (0.272-0.416)**** | 0.628                         | (0.527-0.749)**** | 0.508                                        | (0.419-0.616)**** |
| County Area Deprivation Index    | 0.991                         | (0.986-0.996)***  | 0.998                         | (0.994-1.002)     | 0.991                                        | (0.987-0.996)**** |
| <b>Health Inspection Rating</b>  |                               |                   |                               |                   |                                              |                   |
| ★                                | 1.125                         | (1.065-1.188)**** | 1.081                         | (1.003-1.165)*    | 1.126                                        | (1.071-1.184)**** |
| ★★                               | 1.093                         | (1.037-1.152)***  | 1.082                         | (1.007-1.163)*    | 1.115                                        | (1.062-1.170)**** |

| Independent Variable             | Cumulative Resident Incidence |                   | Cumulative Resident Mortality |                   | Number of weeks with high resident incidence |                   |
|----------------------------------|-------------------------------|-------------------|-------------------------------|-------------------|----------------------------------------------|-------------------|
|                                  | IRR/OR                        | (95% CI)          | IRR/OR                        | (95% CI)          | IRR/OR                                       | (95% CI)          |
| ★★★                              | 1.075                         | (1.020-1.133)**   | 1.058                         | (0.984-1.137)     | 1.112                                        | (1.059-1.167)**** |
| ★★★★                             | 1.025                         | (0.973-1.080)     | 1.011                         | (0.940-1.086)     | 1.068                                        | (1.017-1.121)***  |
| ★★★★★                            | 1.000                         | Reference         | 1.000                         | Reference         | 1.000                                        | Reference         |
| % Medicaid residents in facility | 1.003                         | (1.002-1.003)**** | 1.000                         | (0.999-1.001)     | 1.001                                        | (1.001-1.002)**** |
| County COVID rate (cases/1000)   | 1.004                         | (1.003-1.005)**** | 1.001                         | (1.000-1.002)**   | 1.005                                        | (1.004-1.006)**** |
| Number of certified beds         | 1.000                         | (0.999-1.000)***  | 0.999                         | (0.999-1.000)**** | 1.001                                        | (1.001-1.001)**** |
| Urban facility                   | 1.026                         | (0.989-1.065)     | 0.982                         | (0.934-1.033)     | 1.181                                        | (1.142-1.222)**** |
| County Area Deprivation Index    | 1.002                         | (1.001-1.003)**** | 1.000                         | (0.999-1.001)     | 1.004                                        | (1.003-1.005)**** |
| Zero Model <sup>b</sup>          |                               |                   |                               |                   |                                              |                   |
| County COVID rate (cases/1000)   | 0.967                         | (0.962-0.971)**** | 0.970                         | (0.966-0.975)**** | 0.968                                        | (0.964-0.973)**** |
| Number of certified beds         | 0.972                         | (0.970-0.975)**** | 0.981                         | (0.979-0.983)**** | 0.984                                        | (0.981-0.986)**** |
| Urban facility                   | 0.337                         | (0.272-0.416)**** | 0.628                         | (0.527-0.749)**** | 0.505                                        | (0.417-0.613)**** |
| County Area Deprivation Index    | 0.991                         | (0.986-0.996)***  | 0.998                         | (0.994-1.002)     | 0.991                                        | (0.987-0.996)**** |
| <b>Staffing Rating</b>           |                               |                   |                               |                   |                                              |                   |
| ★                                | 1.226                         | (1.146-1.312)**** | 1.031                         | (0.942-1.129)     | 1.181                                        | (1.111-1.256)**** |
| ★★                               | 1.301                         | (1.239-1.366)**** | 1.058                         | (0.989-1.130)     | 1.205                                        | (1.151-1.261)**** |
| ★★★                              | 1.303                         | (1.244-1.364)**** | 1.072                         | (1.007-1.141)*    | 1.221                                        | (1.170-1.275)**** |
| ★★★★                             | 1.206                         | (1.152-1.262)**** | 1.063                         | (0.998-1.131)     | 1.170                                        | (1.121-1.221)**** |
| ★★★★★                            | 1.000                         | Reference         | 1.000                         | Reference         | 1.000                                        | Reference         |

| Independent Variable             | Cumulative Resident Incidence |                   | Cumulative Resident Mortality |                   | Number of weeks with high resident incidence |                   |
|----------------------------------|-------------------------------|-------------------|-------------------------------|-------------------|----------------------------------------------|-------------------|
|                                  | IRR/OR                        | (95% CI)          | IRR/OR                        | (95% CI)          | IRR/OR                                       | (95% CI)          |
| % Medicaid residents in facility | 1.002                         | (1.001-1.003)**** | 1.000                         | (0.999-1.001)     | 1.001                                        | (1.000-1.001)**** |
| County COVID rate (cases/1000)   | 1.004                         | (1.003-1.005)**** | 1.001                         | (1.000-1.002)***  | 1.005                                        | (1.005-1.006)**** |
| Number of certified beds         | 0.999                         | (0.999-1.000)**** | 0.999                         | (0.999-1.000)**** | 1.001                                        | (1.001-1.001)**** |
| Urban facility                   | 1.025                         | (0.987-1.065)     | 0.982                         | (0.931-1.035)     | 1.184                                        | (1.143-1.227)**** |
| County Area Deprivation Index    | 1.001                         | (1.000-1.002)*    | 1.000                         | (0.999-1.001)     | 1.004                                        | (1.003-1.005)**** |
| <b>Zero Model<sup>b</sup></b>    |                               |                   |                               |                   |                                              |                   |
| County COVID rate (cases/1000)   | 0.964                         | (0.960-0.969)**** | 0.969                         | (0.964-0.973)**** | 0.968                                        | (0.963-0.973)**** |
| Number of certified beds         | 0.972                         | (0.969-0.975)**** | 0.980                         | (0.978-0.983)**** | 0.984                                        | (0.981-0.987)**** |
| Urban facility                   | 0.310                         | (0.246-0.390)**** | 0.592                         | (0.491-0.715)**** | 0.485                                        | (0.394-0.597)**** |
| County Area Deprivation Index    | 0.990                         | (0.985-0.996)***  | 0.997                         | (0.993-1.002)     | 0.991                                        | (0.986-0.996)***  |
| <b>Quality Measure Rating</b>    |                               |                   |                               |                   |                                              |                   |
| ★                                | 1.070                         | (1.003-1.140)*    | 1.097                         | (1.007-1.194)*    | 1.008                                        | (0.952-1.066)     |
| ★★                               | 1.066                         | (1.017-1.116)**   | 1.043                         | (0.981-1.109)     | 1.041                                        | (0.999-1.085)     |
| ★★★                              | 1.047                         | (1.008-1.088)*    | 1.047                         | (0.995-1.102)     | 1.016                                        | (0.982-1.052)     |
| ★★★★                             | 1.046                         | (1.010-1.083)*    | 1.063                         | (1.015-1.114)**   | 1.013                                        | (0.981-1.045)     |
| ★★★★★                            | 1.000                         | Reference         | 1.000                         | Reference         | 1.000                                        | Reference         |
| % Medicaid residents in facility | 1.003                         | (1.002-1.003)**** | 1.000                         | (0.999-1.001)     | 1.001                                        | (1.001-1.002)**** |
| County COVID rate (cases/1000)   | 1.004                         | (1.004-1.005)**** | 1.002                         | (1.001-1.002)**   | 1.005                                        | (1.004-1.006)**** |
| Number of certified beds         | 1.000                         | (0.999-1.000)***  | 0.999                         | (0.999-1.000)**** | 1.001                                        | (1.001-1.002)**** |
| Urban facility                   | 1.033                         | (0.995-1.071)     | 0.990                         | (0.941-1.041)     | 1.187                                        | (1.148-1.228)**** |

| Independent Variable           | Cumulative Resident Incidence |                   | Cumulative Resident Mortality |                   | Number of weeks with high resident incidence |                   |
|--------------------------------|-------------------------------|-------------------|-------------------------------|-------------------|----------------------------------------------|-------------------|
|                                | IRR/OR                        | (95% CI)          | IRR/OR                        | (95% CI)          | IRR/OR                                       | (95% CI)          |
| County Area Deprivation Index  | 1.001                         | (1.001-1.002)***  | 1.000                         | (0.999-1.001)     | 1.004                                        | (1.003-1.005)**** |
| Zero Model <sup>b</sup>        |                               |                   |                               |                   |                                              |                   |
| County COVID rate (cases/1000) | 0.967                         | (0.962-0.971)**** | 0.971                         | (0.966-0.975)**** | 0.969                                        | (0.964-0.973)**** |
| Number of certified beds       | 0.972                         | (0.969-0.975)**** | 0.980                         | (0.978-0.982)**** | 0.983                                        | (0.980-0.986)**** |
| Urban facility                 | 0.340                         | (0.274-0.420)**** | 0.633                         | (0.531-0.754)**** | 0.506                                        | (0.418-0.614)**** |
| County Area Deprivation Index  | 0.991                         | (0.986-0.996)***  | 0.998                         | (0.994-1.002)     | 0.991                                        | (0.987-0.995)**** |

\*p<0.05, \*\*p<0.01, \*\*\*p<0.001, \*\*\*\*p<0.0001.

Abbreviations: IRR = Incidence Rate Ratio; CI = Confidence Interval, OR = Odds Ratio.

<sup>a</sup>Each rating domain is modeled separately, using zero-inflated negative binomial models.

<sup>b</sup>The zero-model is a logit model, predicting the likelihood of having 0 cases, deaths or high-incidence weeks. The estimate is an odds ratio.
